# Supplementary material for: Nutrient Storage and Stoichiometry of the Forest Floor Organic Matter in Japanese Forests
Source: MDPI journal article supplement (doi:10.3390/soilsystems5030051), 2021-08-29
Supplement: s1 [file s1]

Supplementary Materials:

Table S1. Sample size of forest floor mass and nutrients in the prefecture of Japan

| No. | Element<br>Forest type <sup>1)</sup><br>Prefecture | mass |       |         |       |      |        |       |        | Nitrogen |       |         |       |      |        |       |        | Phosphorus |       |         |       |      |        |       |        |
|-----|----------------------------------------------------|------|-------|---------|-------|------|--------|-------|--------|----------|-------|---------|-------|------|--------|-------|--------|------------|-------|---------|-------|------|--------|-------|--------|
|     |                                                    | All  | cedar | cypress | larch | pine | subalp | decid | evergr | All      | cedar | cypress | larch | pine | subalp | decid | evergr | All        | cedar | cypress | larch | pine | subalp | decid | evergr |
| 1   | Hokkaido                                           | 365  | 14    |         | 150   | 7    | 37     | 28    |        | 65       | 3     | 1       | 8     |      | 16     | 8     |        | 43         |       |         |       |      | 10     | 5     |        |
| 2   | Aomori                                             | 38   | 27    |         |       | 6    |        | 1     |        | 6        | 2     |         |       | 2    |        |       |        | 1          |       |         |       |      |        |       |        |
| 3   | Iwate                                              | 44   | 31    | 12      | 4     | 5    |        | 3     |        | 5        | 2     | 1       | 1     |      |        | 1     |        | 3          |       | 1       |       |      |        | 1     |        |
| 4   | Miyagi                                             | 24   | 22    |         |       | 2    |        |       |        | 3        | 2     |         |       | 1    |        |       |        |            |       |         |       |      |        |       |        |
| 5   | Akita                                              | 43   | 39    |         | 1     | 1    |        | 2     |        | 10       | 10    |         |       |      |        |       |        | 8          | 8     |         |       |      |        |       |        |
| 6   | Yamagata                                           | 24   | 23    |         |       |      |        | 1     |        | 1        | 1     |         |       |      |        |       |        |            |       |         |       |      |        |       |        |
| 7   | Fukushima                                          | 38   | 25    |         | 3     | 5    |        | 4     |        | 4        | 2     |         |       |      |        | 2     |        | 1          |       |         |       |      |        | 1     |        |
| 8   | Ibaraki                                            | 41   | 23    | 4       | 1     | 4    |        | 8     | 1      | 8        | 2     |         |       | 3    |        | 3     |        | 10         | 5     |         |       | 2    |        | 3     |        |
| 9   | Tochigi                                            | 58   | 32    | 10      | 2     | 4    | 2      | 8     |        | 6        | 3     | 1       | 1     | 1    |        |       |        | 12         | 7     | 3       |       | 1    |        |       |        |
| 10  | Gunma                                              | 21   | 8     | 3       | 5     | 1    |        | 2     | 1      | 2        |       |         | 1     |      |        | 1     |        | 1          |       |         |       |      |        | 1     |        |
| 11  | Saitama                                            | 14   | 12    |         |       |      | 1      | 1     |        | 6        | 5     |         |       |      | 1      |       |        | 4          | 3     |         |       |      | 1      |       |        |
| 12  | Chiba                                              | 27   | 19    |         |       |      |        | 1     | 7      | 6        | 3     |         |       |      |        |       | 3      | 5          | 1     |         |       |      |        |       | 4      |
| 13  | Tokyo                                              | 9    | 8     |         |       |      |        | 1     |        | 2        | 2     |         |       |      |        |       |        |            |       |         |       |      |        |       |        |
| 14  | Kanagawa                                           | 14   | 13    |         |       |      |        |       |        | 4        | 4     |         |       |      |        |       |        | 2          | 2     |         |       |      |        |       |        |
| 15  | Niigata                                            | 78   | 42    |         |       | 9    | 3      | 18    |        | 20       | 3     |         |       | 5    |        | 9     |        | 12         | 1     |         |       | 5    |        | 3     |        |
| 16  | Toyama                                             | 16   | 16    |         |       |      |        |       |        | 2        | 2     |         |       |      |        |       |        |            |       |         |       |      |        |       |        |
| 17  | Ishikawa                                           | 16   | 16    |         |       |      |        |       |        | 3        | 3     |         |       |      |        |       |        |            |       |         |       |      |        |       |        |
| 18  | Fukui                                              | 19   | 19    |         |       |      |        |       |        | 3        | 3     |         |       |      |        |       |        |            |       |         |       |      |        |       |        |
| 19  | Yamanashi                                          | 18   | 5     |         | 6     | 4    | 1      | 1     |        | 4        | 1     |         | 1     | 1    | 1      |       |        | 1          |       |         |       |      | 1      |       |        |
| 20  | Nagano                                             | 89   | 8     | 10      | 19    | 11   | 8      | 14    |        | 27       | 1     |         | 4     | 6    | 5      | 6     |        | 11         |       |         |       | 2    | 1      |       |        |
| 21  | Gifu                                               | 26   | 8     | 1       | 1     |      |        | 2     |        | 2        |       | 2       |       |      |        |       |        |            |       |         |       |      |        |       |        |
| 22  | Shizuoka                                           | 32   | 13    | 9       |       | 1    |        |       | 1      | 11       | 6     | 3       |       |      |        |       | 1      | 9          | 6     | 2       |       |      |        |       | 1      |
| 23  | Aichi                                              | 16   | 1     | 10      |       | 1    |        | 3     | 1      | 2        |       | 2       |       |      |        |       |        |            |       |         |       |      |        |       |        |
| 24  | Mie                                                | 25   | 9     | 11      |       | 1    |        |       | 3      | 5        | 1     | 1       |       |      |        |       | 3      |            |       |         |       |      |        |       |        |
| 25  | Shiga                                              | 18   | 8     | 6       |       |      |        | 1     |        | 5        |       | 4       |       |      |        |       |        | 2          |       | 1       |       |      |        |       |        |
| 26  | Kyoto                                              | 43   | 10    | 12      |       | 4    |        | 17    |        | 18       |       | 4       |       | 1    |        | 13    |        | 14         |       | 3       |       | 1    |        | 10    |        |
| 27  | Osaka                                              | 6    | 5     | 1       |       |      |        |       |        | 3        | 2     | 1       |       |      |        |       |        |            |       |         |       |      |        |       |        |
| 28  | Hyogo                                              | 31   | 20    | 7       |       | 4    |        |       |        | 2        | 2     |         |       |      |        |       |        | 3          | 3     |         |       |      |        |       |        |
| 29  | Nara                                               | 19   | 12    | 1       |       |      |        | 1     | 5      | 4        | 4     |         |       |      |        |       |        | 1          | 1     |         |       |      |        |       |        |
| 30  | Wakayama                                           | 17   | 15    | 2       |       |      |        |       |        | 4        | 3     |         |       |      |        |       |        |            |       |         |       |      |        |       |        |
| 31  | Tottori                                            | 15   | 10    | 2       |       | 1    |        | 2     |        | 2        | 2     |         |       |      |        |       |        |            |       |         |       |      |        |       |        |
| 32  | Shimane                                            | 31   | 15    |         |       |      |        | 13    |        | 9        | 3     |         |       |      |        | 5     |        | 6          |       |         |       |      |        | 5     |        |
| 33  | Okayama                                            | 22   | 2     | 11      |       | 8    |        | 1     |        | 2        |       | 2       |       |      |        |       |        |            |       |         |       |      |        |       |        |
| 34  | Hiroshima                                          | 29   | 5     | 9       |       | 9    |        | 4     | 2      | 2        | 1     | 1       |       |      |        |       |        |            |       |         |       |      |        |       |        |
| 35  | Yamaguchi                                          | 21   | 10    | 4       |       | 4    |        | 3     |        | 2        | 2     |         |       |      |        |       |        |            |       |         |       |      |        |       |        |
| 36  | Tokushima                                          | 16   | 13    | 3       |       |      |        |       |        | 3        | 3     |         |       |      |        |       |        |            |       |         |       |      |        |       |        |
| 37  | Kagawa                                             | 9    | 5     | 2       |       | 6    |        |       |        | 3        |       |         |       | 2    |        |       |        |            |       |         |       |      |        |       |        |
| 38  | Ehime                                              | 19   | 8     | 10      |       |      |        |       |        | 3        |       | 3       |       |      |        |       |        |            |       |         |       |      |        |       |        |
| 39  | Kochi                                              | 80   | 10    | 64      |       |      | 2      | 1     | 1      | 22       | 5     | 14      |       |      | 2      | 1     |        | 19         | 5     | 11      |       |      | 2      | 1     |        |
| 40  | Fukuoka                                            | 18   | 9     | 9       |       |      |        |       |        | 3        | 1     | 2       |       |      |        |       |        |            |       |         |       |      |        |       |        |
| 41  | Saga                                               | 7    | 2     | 5       |       |      |        |       |        | 1        |       | 1       |       |      |        |       |        |            |       |         |       |      |        |       |        |
| 42  | Nagasaki                                           | 18   | 6     | 12      |       |      |        |       |        | 4        | 1     | 3       |       |      |        |       |        |            |       |         |       |      |        |       |        |
| 43  | Kumamoto                                           | 34   | 18    |         |       | 2    |        |       | 14     | 14       | 1     |         |       | 2    |        |       | 11     | 9          |       |         |       | 2    |        |       | 7      |
| 44  | Oita                                               | 18   | 12    | 5       |       |      |        |       |        | 4        | 3     |         |       |      |        |       |        | 1          | 1     |         |       |      |        |       |        |
| 45  | Miyazaki                                           | 24   | 23    |         |       |      |        |       |        | 3        | 2     | 1       |       |      |        |       |        |            |       |         |       |      |        |       |        |
| 46  | Kagoshima                                          | 38   | 24    | 8       |       | 1    |        | 1     | 4      | 3        | 2     |         |       |      |        |       | 1      | 1          |       |         |       |      |        |       | 1      |
| 47  | Okinawa                                            | 17   | 2     | 1       |       | 2    |        | 3     | 12     | 3        |       |         |       |      |        |       | 3      | 1          |       |         |       |      |        |       | 1      |

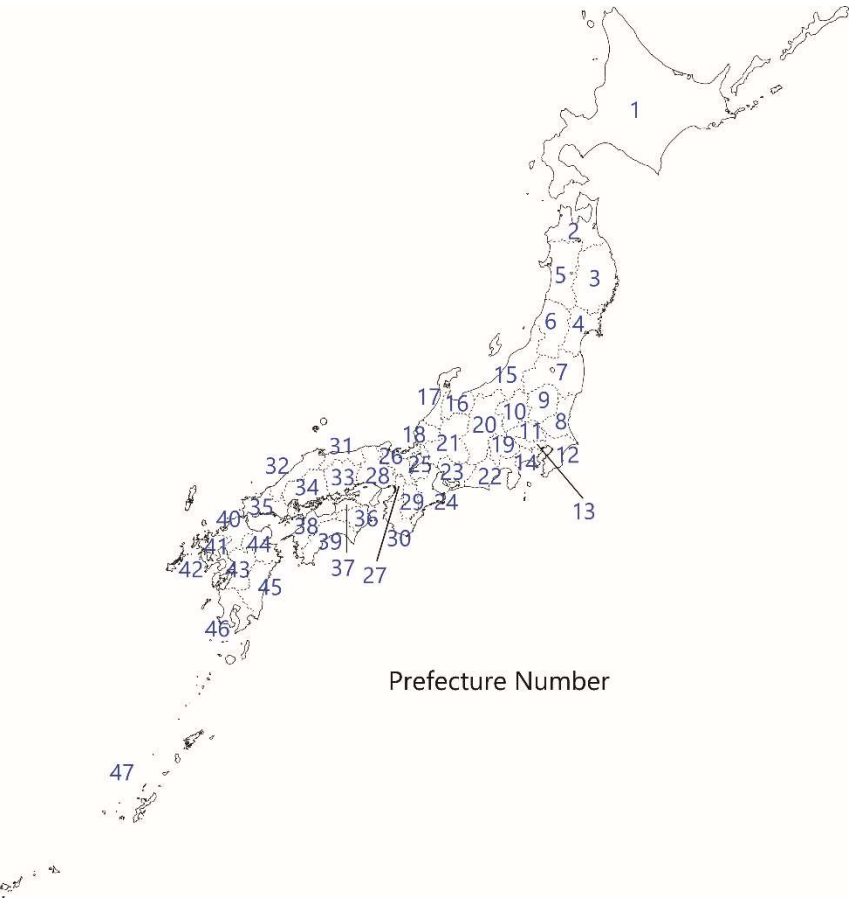

Note: All Tofo fir samples were collected from Hokkaido prefecture

1) All: all tree speceis, subaip: subalpine conifers, decid: deciduous broad-leaved forests: evergr: evergreen broad-leaved forests

|    | Element<br>Forest type<br>Prefecture | Potassium |       |         |       |      |        |       |        |    | Calcium |       |         |       |      |        |       |        |    | Magnesium |       |         |       |      |        |       |        |
|----|--------------------------------------|-----------|-------|---------|-------|------|--------|-------|--------|----|---------|-------|---------|-------|------|--------|-------|--------|----|-----------|-------|---------|-------|------|--------|-------|--------|
|    |                                      | All       | cedar | cypress | larch | pine | subalp | decid | evergr |    | All     | cedar | cypress | larch | pine | subalp | decid | evergr |    | All       | cedar | cypress | larch | pine | subalp | decid | evergr |
| 1  | Hokkaido                             | 55        | 3     |         |       | 8    |        | 10    | 7      |    | 53      | 3     |         |       | 8    |        | 9     | 7      |    | 25        | 3     |         |       | 8    |        |       | 7      |
| 2  | Aomori                               | 4         | 2     |         |       |      |        | 1     |        |    | 4       | 2     |         |       |      |        | 1     |        |    | 4         | 2     |         |       |      | 1      |       |        |
| 3  | Iwate                                | 5         | 2     |         | 1     | 1    |        |       | 1      |    | 5       | 2     |         | 1     | 1    |        |       | 1      |    | 2         | 2     |         |       |      |        |       |        |
| 4  | Miyagi                               | 3         | 2     |         |       |      |        | 1     |        |    | 3       | 2     |         |       |      |        | 1     |        |    | 3         | 2     |         |       |      | 1      |       |        |
| 5  | Akita                                | 10        | 10    |         |       |      |        |       |        |    | 10      | 10    |         |       |      |        |       |        |    | 9         | 9     |         |       |      |        |       |        |
| 6  | Yamagata                             | 1         | 1     |         |       |      |        |       |        |    | 1       | 1     |         |       |      |        |       |        |    | 1         | 1     |         |       |      |        |       |        |
| 7  | Fukushima                            | 3         | 2     |         |       |      |        |       | 1      |    | 3       | 2     |         |       |      |        |       | 1      |    | 3         | 2     |         |       |      |        | 1     |        |
| 8  | Ibaraki                              | 7         | 2     |         |       |      |        | 2     | 3      |    | 7       | 2     |         |       |      | 2      |       | 3      |    | 7         | 2     |         |       | 2    |        | 3     |        |
| 9  | Tochigi                              | 5         | 2     |         | 1     | 1    |        |       |        |    | 5       | 2     |         | 1     | 1    | 1      |       |        | 5  | 2         |       | 1       | 1     | 1    |        |       |        |
| 10 | Gunma                                | 2         |       |         |       | 1    |        |       | 1      |    | 2       |       |         |       | 1    |        |       | 1      |    | 2         |       |         |       | 1    |        | 1     |        |
| 11 | Saitama                              | 6         | 5     |         |       |      |        | 1     |        |    | 6       | 5     |         |       |      |        | 1     |        | 6  | 5         |       |         |       |      |        |       |        |
| 12 | Chiba                                | 7         | 3     |         |       |      |        |       |        | 4  | 7       | 3     |         |       |      |        |       |        | 7  | 3         |       |         |       |      |        | 4     |        |
| 13 | Tokyo                                | 2         | 2     |         |       |      |        |       |        |    | 2       | 2     |         |       |      |        |       |        | 2  | 2         |       |         |       |      |        |       |        |
| 14 | Kanagawa                             | 4         | 4     |         |       |      |        |       |        |    | 4       | 4     |         |       |      |        |       |        | 4  | 4         |       |         |       |      |        |       |        |
| 15 | Niigata                              | 14        | 3     |         |       |      |        | 5     | 3      |    | 14      | 3     |         |       |      | 5      |       | 3      | 14 | 3         |       |         |       | 5    |        | 3     |        |
| 16 | Toyama                               | 2         | 2     |         |       |      |        |       |        |    | 2       | 2     |         |       |      |        |       |        | 2  | 2         |       |         |       |      |        |       |        |
| 17 | Ishikawa                             | 3         | 3     |         |       |      |        |       |        |    | 3       | 3     |         |       |      |        |       |        | 3  | 3         |       |         |       |      |        |       |        |
| 18 | Fukui                                | 3         | 3     |         |       |      |        |       |        |    | 3       | 3     |         | 2     |      |        |       |        | 3  | 3         |       |         |       |      |        |       |        |
| 19 | Yamanashi                            | 4         | 1     |         |       | 1    | 1      | 1     |        |    | 4       | 1     |         |       | 1    | 1      | 1     |        | 4  | 1         |       |         | 1     | 1    |        |       |        |
| 20 | Nagano                               | 8         | 1     |         |       | 4    | 2      | 1     |        |    | 8       | 1     |         |       | 4    | 2      | 1     |        | 8  | 1         |       |         | 4     | 2    |        |       |        |
| 21 | Gifu                                 | 2         |       |         | 2     |      |        |       |        |    | 2       |       |         | 2     |      |        |       |        | 2  |           |       | 2       |       |      |        |       |        |
| 22 | Shizuoka                             | 11        | 6     |         | 3     |      |        |       | 1      |    | 11      | 6     |         | 3     |      |        |       | 1      | 6  | 3         |       | 1       |       |      |        | 1     |        |
| 23 | Aichi                                | 2         |       |         | 2     |      |        |       |        |    | 2       |       |         | 2     |      |        |       |        | 2  |           |       | 2       |       |      |        |       |        |
| 24 | Mie                                  | 2         | 1     |         | 1     |      |        |       |        |    | 2       | 1     |         | 1     |      |        |       |        | 2  | 1         |       | 1       |       |      |        |       |        |
| 25 | Shiga                                | 5         |       |         | 4     |      |        |       |        |    | 5       |       |         | 4     |      |        |       |        | 5  |           |       | 4       |       |      |        |       |        |
| 26 | Kyoto                                | 16        |       |         | 4     |      |        | 1     |        |    | 16      |       |         | 4     |      |        | 1     |        | 16 |           |       | 4       |       |      | 1      |       | 11     |
| 27 | Osaka                                | 3         | 2     |         | 1     |      |        |       |        |    | 3       | 2     |         | 1     |      |        |       |        | 3  | 2         |       | 1       |       |      |        |       |        |
| 28 | Hyogo                                | 2         | 2     |         |       |      |        |       |        |    | 2       | 2     |         |       |      |        |       |        | 2  | 2         |       |         |       |      |        |       |        |
| 29 | Nara                                 | 4         | 4     |         |       |      |        | 1     |        |    | 4       | 4     |         |       |      |        |       |        | 4  | 4         |       |         |       |      |        |       |        |
| 30 | Wakayama                             | 4         | 3     |         | 1     |      |        |       |        |    | 4       | 3     |         | 1     |      |        |       |        | 4  | 3         |       | 1       |       |      |        |       |        |
| 31 | Tottori                              | 2         | 2     |         |       |      |        |       |        |    | 2       | 2     |         |       |      |        |       |        | 2  | 2         |       |         |       |      |        |       |        |
| 32 | Shimane                              | 9         | 3     |         |       |      |        |       | 5      |    | 9       | 3     |         |       |      |        |       | 5      | 9  | 3         |       |         |       |      |        | 5     |        |
| 33 | Okayama                              | 2         |       |         | 2     |      |        |       |        |    | 2       |       |         | 2     |      |        |       |        | 2  |           |       | 2       |       |      |        |       |        |
| 34 | Hiroshima                            | 2         | 1     |         | 1     |      |        |       |        |    | 2       | 1     |         | 1     |      |        |       |        | 2  | 1         |       | 1       |       |      |        |       |        |
| 35 | Yamaguchi                            | 2         | 2     |         |       |      |        |       |        |    | 2       | 2     |         |       |      |        |       |        | 2  | 2         |       |         |       |      |        |       |        |
| 36 | Tokushima                            | 3         | 3     |         |       |      |        |       |        |    | 3       | 3     |         |       |      |        |       |        | 3  | 3         |       |         |       |      |        |       |        |
| 37 | Kagawa                               | 3         |       |         |       |      |        | 2     |        |    | 3       |       |         |       |      | 2      |       |        | 3  |           |       |         |       | 2    |        |       |        |
| 38 | Ehime                                | 3         |       |         | 3     |      |        |       |        |    | 3       |       |         | 3     |      |        |       |        | 3  |           |       | 3       |       |      |        |       |        |
| 39 | Kochi                                | 22        |       | 5       | 14    |      |        |       | 2      | 1  | 20      |       | 5       | 12    |      |        | 2     | 1      | 20 |           | 5     | 12      |       |      |        | 1     |        |
| 40 | Fukuoka                              | 3         | 1     |         | 2     |      |        |       |        |    | 3       | 1     |         |       |      |        |       |        | 3  | 1         |       | 2       |       |      |        |       |        |
| 41 | Saga                                 | 1         |       |         | 1     |      |        |       |        |    | 1       |       |         | 1     |      |        |       |        | 1  |           |       | 1       |       |      |        |       |        |
| 42 | Nagasaki                             | 4         | 1     |         | 3     |      |        |       |        |    | 4       | 1     |         | 3     |      |        |       |        | 4  | 1         |       | 3       |       |      |        |       |        |
| 43 | Kumamoto                             | 10        | 1     |         |       |      |        | 2     |        | 11 | 7       |       | 1       |       |      | 2      |       |        | 10 | 1         |       |         |       | 2    |        | 7     |        |
| 44 | Oita                                 | 4         | 3     |         |       |      |        |       |        |    | 4       | 3     |         |       |      |        |       |        | 4  | 3         |       |         |       |      |        |       |        |
| 45 | Miyazaki                             | 1         | 1     |         |       |      |        |       |        |    | 1       | 1     |         |       |      |        |       |        | 1  | 1         |       |         |       |      |        |       |        |
| 46 | Kagoshima                            | 3         | 2     |         |       |      |        |       |        | 1  | 3       | 2     |         |       |      |        |       | 1      | 3  | 2         |       |         |       |      |        | 1     |        |
| 47 | Okinawa                              | 3         |       |         |       |      |        |       |        |    | 3       |       |         |       |      |        |       | 3      | 3  |           |       |         |       |      |        | 3     |        |

## Supplementary Materials

Table S2. Statistics of dry weight (Mg ha<sup>-1</sup>) of the forest floor mass by forest type group.

| Forest type           | Pl/Na <sup>1)</sup> | Median <sup>2)</sup> | Q1 <sup>3)</sup> | Q3 <sup>4)</sup> | IQR <sup>5)</sup> | Mean | SD   | n    |
|-----------------------|---------------------|----------------------|------------------|------------------|-------------------|------|------|------|
| <b>Coniferous</b>     |                     |                      |                  |                  |                   |      |      |      |
| Cedar                 | Pl                  | 9.30 <i>d</i>        | 6.20             | 13.4             | 7.20              | 10.6 | 6.71 | 683  |
| Cypress               | Pl                  | 6.60 <i>e</i>        | 4.18             | 12.4             | 8.22              | 9.96 | 8.98 | 263  |
| Cypress <sup>6)</sup> | Na                  | 44.8 <sup>7)</sup>   | 21.1             | 62.8             | 41.7              | 46.8 | 26.4 | 16   |
| Larch                 | Pl                  | 12.1 <i>bc</i>       | 6.55             | 17.8             | 11.2              | 13.2 | 8.10 | 192  |
| Pine                  | Pl and Na           | 13.3 <i>bc</i>       | 7.42             | 21.9             | 14.5              | 16.1 | 10.8 | 105  |
| Todo fir              | Pl                  | 14.5 <i>b</i>        | 9.50             | 19.5             | 10.0              | 15.0 | 6.80 | 95   |
| Todo fir              | Na                  | 32.5 <sup>7)</sup>   | 27.0             | 42.9             | 15.9              | 34.9 | 12.4 | 17   |
| Subalpine coniferous  | Na                  | 37.0 <i>a</i>        | 20.5             | 53.2             | 32.8              | 39.0 | 24.0 | 65   |
| <b>Broad-leaved</b>   |                     |                      |                  |                  |                   |      |      |      |
| Deciduous             | Na                  | 12.2 <i>bc</i>       | 8.12             | 21.3             | 13.0              | 17.7 | 16.7 | 161  |
| Evergreen             | Na                  | 9.20 <i>cd</i>       | 6.63             | 12.5             | 5.9               | 11.4 | 7.33 | 56   |
| Oak                   | Na                  | 14.6 <sup>7)</sup>   | 8.83             | 18.9             | 10.1              | 15.4 | 8.36 | 61   |
| <i>Castanopsis</i>    | Na                  | 8.09 <sup>7)</sup>   | 6.46             | 11.5             | 5.1               | 9.66 | 7.90 | 23   |
| Beech                 | Na                  | 18.9 <sup>7)</sup>   | 9.26             | 28.1             | 18.8              | 23.0 | 17.6 | 46   |
| <b>Total</b>          |                     |                      |                  |                  |                   |      |      |      |
| Coniferous            | Pl and Na           | 10.3                 | 6.20             | 16.3             | 10.1              | 13.2 | 11.2 | 1487 |
| Broad-leaved          | Na                  | 11.5                 | 7.93             | 19.0             | 11.1              | 16.2 | 14.9 | 228  |

1) Pl is plantation and Na is natural (semi-natural) forest. 2) Values with different letters indicate significant differences between forest types at  $p < 0.05$  based on the Steel-Dwass test. 3) Q1 is the first quartile (25<sup>th</sup> percentile). 4) Q3 is the third quartile (75<sup>th</sup> percentile). 5) IQR is the interquartile range. 6) Data on natural cypress forests were collected only from Nagano Prefecture. 7) data is not included in the multiple comparison test.

Table S3. Statistics of N storage (kg ha<sup>-1</sup>) in the forest floor by forest type group.

| Forest type          | Pl/Na <sup>1)</sup> | Median <sup>2)</sup> | Q1 <sup>3)</sup> | Q3 <sup>4)</sup> | IQR <sup>5)</sup> | Mean | SD   | n   |
|----------------------|---------------------|----------------------|------------------|------------------|-------------------|------|------|-----|
| <b>Coniferous</b>    |                     |                      |                  |                  |                   |      |      |     |
| Cedar                | Pl                  | 111 <i>ce</i>        | 72.7             | 186              | 113               | 140  | 95.5 | 98  |
| Cypress              | Pl                  | 89.0 <i>ce</i>       | 41.0             | 154              | 113               | 121  | 113  | 47  |
| Larch                | Pl                  | 205 <i>ab</i>        | 149              | 250              | 101               | 200  | 91.4 | 16  |
| Pine                 | Pl and Na           | 96.2 <i>bcde</i>     | 61.9             | 268              | 206               | 162  | 131  | 21  |
| Todo fir             | Pl                  | 261 <i>ab</i>        | 237              | 298              | 61                | 260  | 48.7 | 24  |
| Subalpine coniferous | Na                  | 533 <i>a</i>         | 224              | 903              | 679               | 611  | 480  | 26  |
| <b>Broad-leaved</b>  |                     |                      |                  |                  |                   |      |      |     |
| Deciduous            | Na                  | 149 <i>abcd</i>      | 109              | 390              | 281               | 393  | 577  | 49  |
| Evergreen            | Na                  | 123 <i>cde</i>       | 91.5             | 150              | 58.8              | 166  | 145  | 22  |
| Oak                  | Na                  | 149 <sup>6)</sup>    | 102              | 290              | 188               | 211  | 163  | 16  |
| Beech                | Na                  | 450 <sup>6)</sup>    | 117              | 1058             | 941               | 692  | 595  | 15  |
| <b>Total</b>         |                     |                      |                  |                  |                   |      |      |     |
| Coniferous           | Pl and Na           | 140                  | 81.5             | 270              | 189               | 215  | 236  | 253 |
| Broad-leaved         | Na                  | 138                  | 106              | 289              | 183               | 321  | 493  | 72  |

1) Pl is plantation and Na is natural and semi-natural forest. 2) Values with different letters indicate significant differences between forest types at  $p < 0.05$  based on the Steel-Dwass test. 3) Q1 is the first quartile. 4) Q3 is the third quartile. 5) IQR is the interquartile range. 6) data is not included in the multiple comparison test.

**Table S4.** Statistics of P storage (kg ha<sup>-1</sup>) in the forest floor by forest type group.

| Forest type          | Pl/Na <sup>1)</sup> | Median <sup>2)</sup> | Q1 <sup>3)</sup> | Q3 <sup>4)</sup> | IQR <sup>5)</sup> | Mean | SD   | n   |
|----------------------|---------------------|----------------------|------------------|------------------|-------------------|------|------|-----|
| <b>Coniferous</b>    |                     |                      |                  |                  |                   |      |      |     |
| Cedar                | Pl                  | 5.66 <i>cde</i>      | 4.36             | 10.9             | 6.52              | 7.90 | 5.17 | 43  |
| Cypress              | Pl                  | 3.10 <i>df</i>       | 1.30             | 4.25             | 2.95              | 4.51 | 6.24 | 19  |
| Pine                 | Pl and Na           | 5.93 <i>cd</i>       | 4.95             | 16.1             | 11.2              | 9.83 | 8.30 | 10  |
| Todo fir             | Pl                  | 22.0 <i>b</i>        | 18.7             | 24.4             | 5.75              | 21.4 | 3.74 | 24  |
| Subalpine coniferous | Na                  | 35.6 <i>a</i>        | 15.1             | 72.4             | 57.2              | 41.6 | 32.6 | 19  |
| <b>Broad-leaved</b>  |                     |                      |                  |                  |                   |      |      |     |
| Deciduous            | Na                  | 8.75 <i>c</i>        | 6.48             | 13.2             | 6.72              | 12.7 | 10.4 | 30  |
| Evergreen            | Na                  | 6.55 <i>cd</i>       | 4.59             | 11.4             | 6.85              | 10.0 | 9.51 | 14  |
| <b>Total</b>         |                     |                      |                  |                  |                   |      |      |     |
| Coniferous           | Pl and Na           | 11.2                 | 5.25             | 21.6             | 16.4              | 16.1 | 18.0 | 134 |
| Broad-leaved         | Na                  | 8.27                 | 5.92             | 12.8             | 6.83              | 11.8 | 10.1 | 44  |

1) Pl is plantation and Na is natural and semi-natural forest. 2) Values with different letters indicate significant differences between forest types at  $p < 0.05$  based on the Steel-Dwass test. 3) Q1 is the first quartile. 4) Q3 is the third quartile.

5) IQR is the interquartile range

**Table S5.** Statistics of K storage (kg ha<sup>-1</sup>) in the forest floor by forest type group.

| Forest type          | Pl/Na <sup>1)</sup> | Median <sup>2)</sup> | Q1 <sup>3)</sup> | Q3 <sup>4)</sup> | IQR <sup>5)</sup> | Mean | SD   | n   |
|----------------------|---------------------|----------------------|------------------|------------------|-------------------|------|------|-----|
| <b>Coniferous</b>    |                     |                      |                  |                  |                   |      |      |     |
| Cedar                | Pl                  | 11.2 <i>cd</i>       | 6.8              | 20.1             | 13.3              | 18.5 | 29.0 | 96  |
| Cypress              | Pl                  | 10.9 <i>cd</i>       | 5.7              | 23.4             | 17.7              | 18.8 | 21.7 | 46  |
| Larch                | Pl                  | 19.2 <i>a</i>        | 13.3             | 25.9             | 12.5              | 28.0 | 29.7 | 16  |
| Pine                 | Pl and Na           | 13.0 <i>cd</i>       | 9.5              | 34.6             | 25.1              | 19.2 | 13.9 | 15  |
| Todo fir             | Pl                  | 35.7 <i>ab</i>       | 29.3             | 39.4             | 10.1              | 35.7 | 7.2  | 23  |
| Subalpine coniferous | Na                  | 51.6 <i>a</i>        | 38.8             | 63.3             | 24.5              | 56.3 | 32.5 | 14  |
| <b>Broad-leaved</b>  |                     |                      |                  |                  |                   |      |      |     |
| Deciduous            | Na                  | 10.9 <i>cd</i>       | 6.7              | 29.2             | 22.4              | 17.2 | 15.2 | 33  |
| Evergreen            | Na                  | 16.4 <i>cd</i>       | 10.4             | 22.2             | 11.8              | 18.5 | 13.3 | 16  |
| <b>Total</b>         |                     |                      |                  |                  |                   |      |      |     |
| Coniferous           | Pl and Na           | 15.9                 | 8.3              | 34.6             | 26.3              | 24.5 | 27.2 | 226 |
| Broad-leaved         | Na                  | 13.5                 | 8.3              | 26.4             | 18.1              | 17.9 | 14.5 | 50  |

1) Pl is plantation and Na is natural and semi-natural forest. 2) Values with different letters indicate significant differences between forest types at  $p < 0.05$  based on the Steel-Dwass test. 3) Q1 is the first quartile. 4) Q3 is the third quartile.

5) IQR is the interquartile range

**Table S6.** Statistics of Ca storage (kg ha<sup>-1</sup>) in the forest floor by forest type group.

| Forest type          | Pl/Na <sup>1)</sup> | Median <sup>2)</sup> | Q1 <sup>3)</sup> | Q3 <sup>4)</sup> | IQR <sup>5)</sup> | Mean | SD   | n   |
|----------------------|---------------------|----------------------|------------------|------------------|-------------------|------|------|-----|
| <b>Coniferous</b>    |                     |                      |                  |                  |                   |      |      |     |
| Cedar                | Pl                  | 147 <i>ab</i>        | 113              | 226              | 113               | 182  | 109  | 96  |
| Cypress              | Pl                  | 57.3 <i>e</i>        | 26.9             | 85               | 58.1              | 78.4 | 93.1 | 44  |
| Larch                | Pl                  | 102 <i>abcde</i>     | 73.8             | 121              | 47.0              | 119  | 86.1 | 16  |
| Pine                 | Pl and Na           | 48.3 <i>bde</i>      | 40.0             | 105              | 64.9              | 77.9 | 57.7 | 15  |
| Todo fir             | Pl                  | 146 <i>bcd</i>       | 114              | 169              | 35.0              | 144  | 51.1 | 22  |
| Subalpine coniferous | Na                  | 233 <i>a</i>         | 148              | 454              | 305               | 264  | 158  | 13  |
| <b>Broad-leaved</b>  |                     |                      |                  |                  |                   |      |      |     |
| Deciduous            | Na                  | 94.5 <i>e</i>        | 63.4             | 133              | 69.6              | 93.8 | 47.4 | 32  |
| Evergreen            | Na                  | 156 <i>ab</i>        | 108              | 185              | 76.3              | 158  | 75.3 | 16  |
| <b>Total</b>         |                     |                      |                  |                  |                   |      |      |     |
| Coniferous           | Pl and Na           | 120                  | 66.5             | 200              | 134               | 152  | 124  | 222 |
| Broad-leaved         | Na                  | 116                  | 69.3             | 154              | 84.7              | 113  | 65.3 | 50  |

1) Pl is plantation and Na is natural and semi-natural forest. 2) Values with different letters indicate significant differences between forest types at  $p < 0.05$  based on the Steel-Dwass test. 3) Q1 is the first quartile. 4) Q3 is the third quartile.

5) IQR is the interquartile range

**Table S7.** Statistics of Mg storage (kg ha<sup>-1</sup>) in the forest floor by forest type group.

| Forest type         | Pl/Na <sup>1)</sup> | Median <sup>2)</sup> | Q1 <sup>3)</sup> | Q3 <sup>4)</sup> | IQR <sup>5)</sup> | Mean | SD   | n   |
|---------------------|---------------------|----------------------|------------------|------------------|-------------------|------|------|-----|
| <b>Coniferous</b>   |                     |                      |                  |                  |                   |      |      |     |
| Cedar               | Pl                  | 17.9                 | 10.2             | 26.6             | 16.4              | 23.5 | 22.7 | 92  |
| Cypress             | Pl                  | 9.1                  | 4.9              | 21.3             | 16.4              | 14.7 | 14.2 | 41  |
| Larch               | Pl                  | 23.5                 | 14.3             | 26.6             | 12.3              | 28.0 | 24.8 | 15  |
| Pine                | Pl and Na           | 18.1                 | 10.3             | 26.4             | 16.1              | 19.6 | 11.8 | 15  |
| <b>Broad-leaved</b> |                     |                      |                  |                  |                   |      |      |     |
| Deciduous           | Na                  | 18.8                 | 11.6             | 28.2             | 16.6              | 19.9 | 12.3 | 31  |
| Evergreen           | Na                  | 22.7                 | 16.5             | 28.1             | 11.6              | 26.9 | 19.4 | 16  |
| <b>Total</b>        |                     |                      |                  |                  |                   |      |      |     |
| Coniferous          | Pl and Na           | 18.0                 | 9.3              | 27.3             | 18.0              | 23.2 | 22.1 | 186 |
| Broad-leaved        | Na                  | 19.7                 | 13.0             | 28.5             | 15.6              | 22.0 | 15.3 | 49  |

1) Pl is plantation and Na is natural and semi-natural forest. 2) No significant difference among forest types at  $p < 0.05$  based on the Steel-Dwass test. 3) Q1 is the first quartile. 4) Q3 is the third quartile. 5) IQR is the interquartile range

**Table S8.** Statistics of C:N ratio in the forest floor by forest type group.

| Forest type          | Pl/Na <sup>1)</sup> | Median <sup>2)</sup> | Q1 <sup>3)</sup> | Q3 <sup>4)</sup> | IQR <sup>5)</sup> | Mean | SD   | n   |
|----------------------|---------------------|----------------------|------------------|------------------|-------------------|------|------|-----|
| <b>Coniferous</b>    |                     |                      |                  |                  |                   |      |      |     |
| Cedar                | Pl                  | 49.8 <i>a</i>        | 40.0             | 60.3             | 20.4              | 51.2 | 16.5 | 98  |
| Cypress              | Pl                  | 47.2 <i>ab</i>       | 37.0             | 56.1             | 19.1              | 49.3 | 18.0 | 47  |
| Larch                | Pl                  | 35.4 <i>cd</i>       | 28.5             | 40.2             | 11.8              | 35.3 | 8.4  | 16  |
| Pine                 | Pl and Na           | 40.7 <i>abc</i>      | 33.0             | 47.9             | 14.9              | 41.0 | 10.1 | 21  |
| Todo fir             | Pl                  | 31.3 <i>d</i>        | 29.4             | 33.2             | 3.8               | 33.2 | 8.8  | 24  |
| Subalpine coniferous | Na                  | 32.4 <i>d</i>        | 27.6             | 35.7             | 8.1               | 39.4 | 33.6 | 26  |
| <b>Broad-leaved</b>  |                     |                      |                  |                  |                   |      |      |     |
| Deciduous            | Na                  | 28.2 <i>d</i>        | 23.2             | 33.2             | 10.0              | 32.9 | 16.5 | 49  |
| Evergreen            | Na                  | 36.3 <i>bcd</i>      | 28.2             | 45.4             | 17.3              | 36.3 | 10.8 | 22  |
| <b>Total</b>         |                     |                      |                  |                  |                   |      |      |     |
| Coniferous           | Pl and Na           | 40.5                 | 32.2             | 53.5             | 21.3              | 45.1 | 18.8 | 253 |
| Broad-leaved         | Na                  | 29.5                 | 24.2             | 38.2             | 14.0              | 34.2 | 14.9 | 72  |

1) Pl is plantation and Na is natural and semi-natural forest. 2) Values with different letters indicate significant differences between forest types at  $p < 0.05$  based on the Steel-Dwass test. 3) Q1 is the first quartile. 4) Q3 is the third quartile. 5) IQR is the interquartile range

**Table S9.** Statistics of C:P ratio in the forest floor by forest type group.

| Forest type          | Pl/Na <sup>1)</sup> | Median <sup>2)</sup> | Q1 <sup>3)</sup> | Q3 <sup>4)</sup> | IQR <sup>5)</sup> | Mean | SD   | n   |
|----------------------|---------------------|----------------------|------------------|------------------|-------------------|------|------|-----|
| <b>Coniferous</b>    |                     |                      |                  |                  |                   |      |      |     |
| Cedar                | Pl                  | 957 <i>a</i>         | 631              | 1331             | 699               | 983  | 405  | 43  |
| Cypress              | Pl                  | 914 <i>ab</i>        | 600              | 1174             | 574               | 939  | 418  | 19  |
| Pine                 | Pl and Na           | 562 <i>abc</i>       | 470              | 724              | 254               | 580  | 130  | 10  |
| Todo fir             | Pl                  | 394 <i>d</i>         | 361              | 422              | 61                | 397  | 59.3 | 24  |
| Subalpine coniferous | Na                  | 486 <i>cd</i>        | 393              | 570              | 177               | 587  | 507  | 19  |
| <b>Broad-leaved</b>  |                     |                      |                  |                  |                   |      |      |     |
| Deciduous            | Na                  | 617 <i>bcd</i>       | 434              | 748              | 314               | 685  | 406  | 30  |
| Evergreen            | Na                  | 862 <i>abc</i>       | 534              | 976              | 442               | 800  | 258  | 14  |
| <b>Total</b>         |                     |                      |                  |                  |                   |      |      |     |
| Coniferous           | Pl and Na           | 575                  | 429              | 957              | 528               | 731  | 414  | 134 |
| Broad-leaved         | Na                  | 646                  | 441              | 876              | 435               | 722  | 367  | 44  |

1) Pl is plantation and Na is natural and semi-natural forest. 2) Values with different letters indicate significant differences between forest types at  $p < 0.05$  based on the Steel-Dwass test. 3) Q1 is the first quartile. 4) Q3 is the third quartile. 5) IQR is the interquartile range

**Table S10.** Statistics of N:P ratio in the forest floor by forest type group.

| Forest type          | Pl/Na <sup>1)</sup> | Median <sup>2)</sup> | Q1 <sup>3)</sup> | Q3 <sup>4)</sup> | IQR <sup>5)</sup> | Mean | SD  | n   |
|----------------------|---------------------|----------------------|------------------|------------------|-------------------|------|-----|-----|
| <b>Coniferous</b>    |                     |                      |                  |                  |                   |      |     |     |
| Cedar                | Pl                  | 20.2 <i>a</i>        | 15.1             | 24.0             | 8.9               | 19.9 | 5.6 | 28  |
| Cypress              | Pl                  | 19.3 <i>a</i>        | 16.6             | 22.4             | 5.8               | 20.3 | 8.4 | 19  |
| Pine                 | Pl and Na           | 11.8 <i>b</i>        | 10.7             | 17.6             | 6.9               | 13.6 | 5.0 | 10  |
| Todo fir             | Pl                  | 12.2 <i>b</i>        | 11.2             | 13.8             | 2.6               | 12.2 | 2.0 | 23  |
| Subalpine coniferous | Na                  | 13.7 <i>ab</i>       | 12.5             | 15.8             | 3.3               | 14.3 | 5.4 | 19  |
| <b>Broad-leaved</b>  |                     |                      |                  |                  |                   |      |     |     |
| Deciduous            | Na                  | 18.2 <i>a</i>        | 13.6             | 22.8             | 9.2               | 19.0 | 6.7 | 30  |
| Evergreen            | Na                  | 20.3 <i>a</i>        | 18.9             | 22.4             | 3.5               | 21.9 | 7.3 | 13  |
| <b>Total</b>         |                     |                      |                  |                  |                   |      |     |     |
| Coniferous           | Pl and Na           | 15.5                 | 12.2             | 19.6             | 7.4               | 16.4 | 6.3 | 118 |
| Broad-leaved         | Na                  | 19.2                 | 14.4             | 22.5             | 8.2               | 19.9 | 6.9 | 43  |

1) Pl is plantation and Na is natural and semi-natural forest. 2) Values with different letters indicate significant differences between forest types at  $p < 0.05$  based on the Steel-Dwass test. 3) Q1 is the first quartile. 4) Q3 is the third quartile.

5) IQR is the interquartile range

**Table S11.** Statistics of C:Ca ratio in the forest floor by forest type group.

| Forest type          | Pl/Na <sup>1)</sup> | Median <sup>2)</sup> | Q1 <sup>3)</sup> | Q3 <sup>4)</sup> | IQR <sup>5)</sup> | Mean | SD   | n   |
|----------------------|---------------------|----------------------|------------------|------------------|-------------------|------|------|-----|
| <b>Coniferous</b>    |                     |                      |                  |                  |                   |      |      |     |
| Cedar                | Pl                  | 34.8 <i>c</i>        | 27.1             | 43.3             | 16.2              | 37.9 | 15.5 | 96  |
| Cypress              | Pl                  | 72.6 <i>a</i>        | 49.1             | 112              | 63.2              | 80.3 | 39.0 | 44  |
| Larch                | Pl                  | 62.1 <i>ab</i>       | 47.6             | 81.8             | 34.2              | 69.7 | 37.9 | 16  |
| Pine                 | Pl and Na           | 63.8 <i>ab</i>       | 55.1             | 96.2             | 41.0              | 82.2 | 55.7 | 15  |
| Todo fir             | Pl                  | 59.9 <i>ab</i>       | 51.9             | 72.4             | 20.5              | 65.2 | 22.5 | 22  |
| Subalpine coniferous | Na                  | 60.7 <i>ab</i>       | 38.2             | 139              | 101               | 93.8 | 70.0 | 13  |
| <b>Broad-leaved</b>  |                     |                      |                  |                  |                   |      |      |     |
| Deciduous            | Na                  | 72.1 <i>ab</i>       | 39.1             | 172              | 133               | 130  | 132  | 32  |
| Evergreen            | Na                  | 38.6 <i>bc</i>       | 26.9             | 66.1             | 39.2              | 49.7 | 36.5 | 16  |
| <b>Total</b>         |                     |                      |                  |                  |                   |      |      |     |
| Coniferous           | Pl and Na           | 49.1                 | 34.1             | 72.9             | 38.8              | 62.1 | 47.0 | 222 |
| Broad-leaved         | Na                  | 58.8                 | 32.8             | 123              | 90.5              | 108  | 122  | 50  |

1) Pl is plantation and Na is natural and semi-natural forest. 2) Values with different letters indicate significant differences between forest types at  $p < 0.05$  based on the Steel-Dwass test. 3) Q1 is the first quartile. 4) Q3 is the third quartile.

5) IQR is the interquartile range

**Table S12.** Statistics of C:Mg ratio in the forest floor by forest type group.

| Forest type         | Pl/Na <sup>1)</sup> | Median <sup>2)</sup> | Q1 <sup>3)</sup> | Q3 <sup>4)</sup> | IQR <sup>5)</sup> | Mean | SD  | n   |
|---------------------|---------------------|----------------------|------------------|------------------|-------------------|------|-----|-----|
| <b>Coniferous</b>   |                     |                      |                  |                  |                   |      |     |     |
| Cedar               | Pl                  | 366                  | 258              | 482              | 224               | 380  | 193 | 92  |
| Cypress             | Pl                  | 444                  | 254              | 809              | 556               | 512  | 327 | 41  |
| Larch               | Pl                  | 267                  | 193              | 381              | 188               | 308  | 158 | 15  |
| Pine                | Pl and Na           | 323                  | 214              | 394              | 180               | 305  | 119 | 15  |
| <b>Broad-leaved</b> |                     |                      |                  |                  |                   |      |     |     |
| Deciduous           | Na                  | 363                  | 246              | 589              | 343               | 680  | 837 | 31  |
| Evergreen           | Na                  | 283                  | 172              | 393              | 221               | 291  | 144 | 16  |
| <b>Total</b>        |                     |                      |                  |                  |                   |      |     |     |
| Coniferous          | Pl and Na           | 363                  | 240              | 505              | 265               | 412  | 252 | 186 |
| Broad-leaved        | Na                  | 304                  | 226              | 535              | 309               | 624  | 900 | 49  |

1) Pl is plantation and Na is natural and semi-natural forest. 2) No significant difference among forest types at  $p < 0.05$  based on the Steel-Dwass test. 3) Q1 is the first quartile. 4) Q3 is the third quartile. 5) IQR is the interquartile range

**Table S13.** Statistics of C:K ratio in the forest floor by forest type group.

| Forest type          | Pl/Na <sup>1)</sup> | Median <sup>2)</sup> | Q1 <sup>3)</sup> | Q3 <sup>4)</sup> | IQR <sup>5)</sup> | Mean | SD   | n   |
|----------------------|---------------------|----------------------|------------------|------------------|-------------------|------|------|-----|
| <b>Coniferous</b>    |                     |                      |                  |                  |                   |      |      |     |
| Cedar                | Pl                  | 510 <i>a</i>         | 378              | 638              | 260               | 520  | 251  | 96  |
| Cypress              | Pl                  | 321 <i>abcde</i>     | 198              | 571              | 373               | 433  | 327  | 46  |
| Larch                | Pl                  | 341 <i>bc</i>        | 204              | 448              | 244               | 340  | 150  | 16  |
| Pine                 | Pl and Na           | 299 <i>abcde</i>     | 211              | 461              | 250               | 325  | 125  | 15  |
| Todo fir             | Pl                  | 233 <i>ce</i>        | 216              | 286              | 70                | 241  | 41   | 23  |
| Subalpine coniferous | Na                  | 329 <i>abcd</i>      | 268              | 388              | 120               | 366  | 175  | 14  |
| <b>Broad-leaved</b>  |                     |                      |                  |                  |                   |      |      |     |
| Deciduous            | Na                  | 473 <i>ab</i>        | 256              | 995              | 739               | 1088 | 1507 | 32  |
| Evergreen            | Na                  | 354 <i>ab</i>        | 298              | 464              | 165               | 374  | 107  | 16  |
| <b>Total</b>         |                     |                      |                  |                  |                   |      |      |     |
| Coniferous           | Pl and Na           | 370                  | 234              | 563              | 329               | 432  | 258  | 226 |
| Broad-leaved         | Na                  | 426                  | 281              | 576              | 295               | 966  | 1547 | 50  |

1) Pl is plantation and Na is natural and semi-natural forest. 2) Values with different letters indicate significant differences between forest types at  $p < 0.05$  based on the Steel-Dwass test. 3) Q1 is the first quartile. 4) Q3 is the third quartile.

5) IQR is the interquartile range
